# Supplementary material
Source: Springer Nature journal article supplement (https://www.springermedizin.de/resource/supplementary/13002_2008_127_MOESM2_ESM.pdf/9627224)

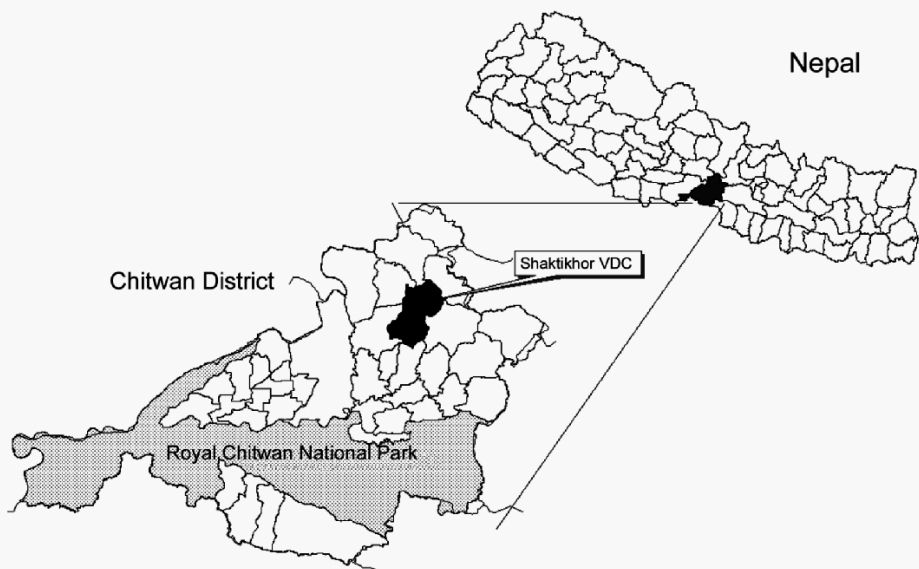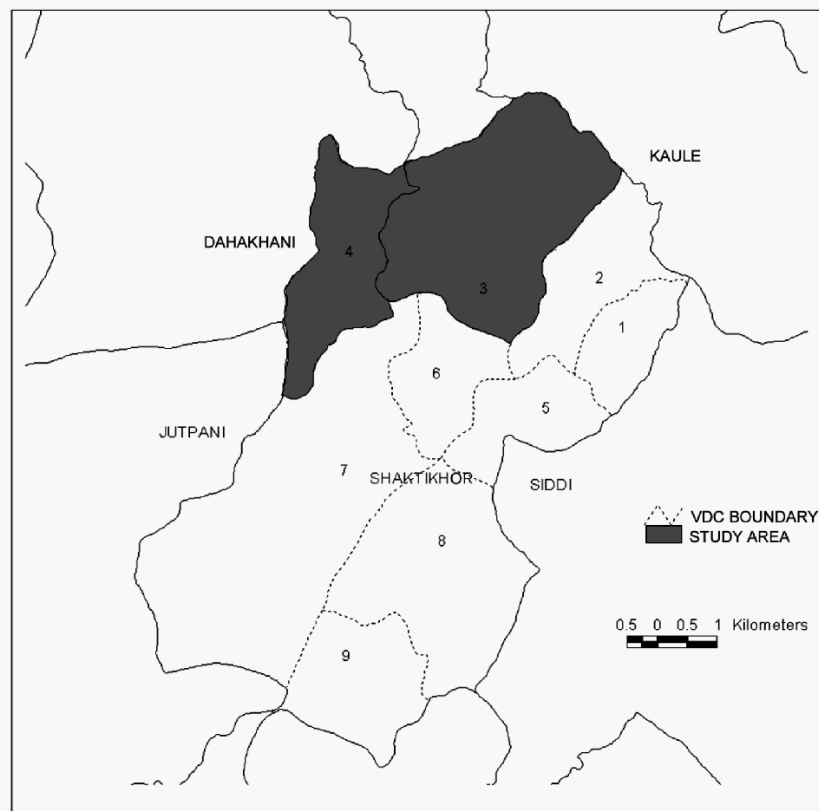

Supplement: MOESM2 [file 9627224]
